# Supplementary material for: Structural and Proteomic Studies of the Aureococcus anophagefferens Virus Demonstrate a Global Distribution of Virus-Encoded Carbohydrate Processing
Source: Front Microbiol. 2020 Sep 8;11:2047. doi: 10.3389/fmicb.2020.02047 (PMC7507832; doi:10.3389/fmicb.2020.02047)
Supplement: Supplementary file 3 [file Data_Sheet_1.xlsx]

## Sheet: Supplemental Data 1.1
Supplemental Data 1.1: List of reciprocal best BLAST hit pairs with their NCLDV COG category.
Category	Category Number	Protein 1	Virus 1	Protein 1 - location	Protein 2	Virus 2	Protein 2 - location	Description from NCVOG
Unknown	1	NP_048433.1	PBCV1	44498..45226	AUL77661.1	Tupanvirus	187045..187764	uncharacterized protein
Helicases	2	YP_003986882.1	APMV	492593..496038	AUL78021.1	Tupanvirus	656582..660313	unclassified DEAD/SNF2-like helicases
Helicases	2	YP_009000929.1	Pithovirus	32718..36052	AUL78021.1	Tupanvirus	656582..660313	unclassified DEAD/SNF2-like helicases
Helicases	2	YP_003406944.1	Marseillevirus	160248..162566	YP_009094682.1	Melbournevirus	165588..167915	DEAD-like helicases superfamily	unclassified DEAD/SNF2-like helicases
Helicases	2	YP_003406980.1	Marseillevirus	189983..194596	YP_009094717.1	Melbournevirus	195325..199938	DEAD-like helicases superfamily	unclassified DEAD/SNF2-like helicases
Helicases	2	YP_003406980.1	Marseillevirus	189983..194596	YP_009000929.1	Pithovirus	32718..36052	DEAD-like helicases superfamily	unclassified DEAD/SNF2-like helicases
Helicases	2	YP_003969741.1	CroV	100708..104103	AUL78021.1	Tupanvirus	656582..660313	DEAD-like helicases superfamily	unclassified DEAD/SNF2-like helicases
Helicases	2	YP_003969763.1	CroV	131226..132938	YP_003406944.1	Marseillevirus	160248..162566	DEAD-like helicases superfamily	unclassified DEAD/SNF2-like helicases
Helicases	2	YP_003969763.1	CroV	131226..132938	YP_009094682.1	Melbournevirus	165588..167915	DEAD-like helicases superfamily	unclassified DEAD/SNF2-like helicases
Helicases	2	YP_003969763.1	CroV	131226..132938	YP_009000929.1	Pithovirus	32718..36052	DEAD-like helicases superfamily	unclassified DEAD/SNF2-like helicases
Helicases	2	YP_003969915.1	CroV	307858..310191	AUL77941.1	Tupanvirus	552750..555131	DEAD-like helicases superfamily	unclassified DEAD/SNF2-like helicases
Helicases	2	YP_003986853.1	APMV	454095..456630	YP_003969915.1	CroV	307858..310191	DEAD-like helicases superfamily	unclassified DEAD/SNF2-like helicases
Helicases	2	YP_003986853.1	APMV	454095..456630	AUL77941.1	Tupanvirus	552750..555131	DEAD-like helicases superfamily	unclassified DEAD/SNF2-like helicases
Helicases	2	YP_003986882.1	APMV	492593..496038	YP_003969741.1	CroV	100708..104103	DEAD-like helicases superfamily	unclassified DEAD/SNF2-like helicases
Helicases	2	YP_003987078.1	APMV	753488..755209	YP_003969763.1	CroV	131226..132938	DEAD-like helicases superfamily	unclassified DEAD/SNF2-like helicases
Helicases	2	YP_003987078.1	APMV	753488..755209	YP_003406944.1	Marseillevirus	160248..162566	DEAD-like helicases superfamily	unclassified DEAD/SNF2-like helicases
Helicases	2	YP_003987078.1	APMV	753488..755209	YP_009094682.1	Melbournevirus	165588..167915	DEAD-like helicases superfamily	unclassified DEAD/SNF2-like helicases
Helicases	2	YP_003987078.1	APMV	753488..755209	YP_009000929.1	Pithovirus	32718..36052	DEAD-like helicases superfamily	unclassified DEAD/SNF2-like helicases
Helicases	2	YP_009052254.1	AaV	168698..170956	YP_003969915.1	CroV	307858..310191	DEAD-like helicases superfamily	unclassified DEAD/SNF2-like helicases
Helicases	2	YP_009052254.1	AaV	168698..170956	YP_003406944.1	Marseillevirus	160248..162566	DEAD-like helicases superfamily	unclassified DEAD/SNF2-like helicases
Helicases	2	YP_009052254.1	AaV	168698..170956	YP_009094682.1	Melbournevirus	165588..167915	DEAD-like helicases superfamily	unclassified DEAD/SNF2-like helicases
Helicases	2	YP_009052343.1	AaV	249951..252746	YP_003987078.1	APMV	753488..755209	DEAD-like helicases superfamily	unclassified DEAD/SNF2-like helicases
Helicases	2	YP_009052343.1	AaV	249951..252746	YP_003969763.1	CroV	131226..132938	DEAD-like helicases superfamily	unclassified DEAD/SNF2-like helicases
Helicases	2	YP_009052343.1	AaV	249951..252746	YP_003406980.1	Marseillevirus	189983..194596	DEAD-like helicases superfamily	unclassified DEAD/SNF2-like helicases
Helicases	2	YP_009052343.1	AaV	249951..252746	YP_009094717.1	Melbournevirus	195325..199938	DEAD-like helicases superfamily	unclassified DEAD/SNF2-like helicases
Helicases	2	YP_009052343.1	AaV	249951..252746	YP_009000929.1	Pithovirus	32718..36052	DEAD-like helicases superfamily	unclassified DEAD/SNF2-like helicases
Helicases	2	YP_009094717.1	Melbournevirus	195325..199938	YP_009000929.1	Pithovirus	32718..36052	DEAD-like helicases superfamily	unclassified DEAD/SNF2-like helicases
Helicases	2	YP_003987055.1	APMV	724648..726735	AUL77758.1	Tupanvirus	306229..308262	RNA-helicase DExH-NPH-II
Kinases/Phosphatases	14	YP_008318868.2	Dulcis	398462..400213	YP_008436766.1	Salinus	325240..327645	Serine/Threonine protein kinase
Kinases/Phosphatases	14	YP_009165285.1	Mollivirus	369994..372413	YP_009430224.1	Dulcis	830344..833479	Serine/Threonine protein kinase
Kinases/Phosphatases	14	YP_009165285.1	Mollivirus	369994..372413	YP_008437210.1	Salinus	753847..756268	Serine/Threonine protein kinase
Kinases/Phosphatases	14	YP_009430186.1	Dulcis	361367..363841	YP_009429967.1	Salinus	295328..297948	Serine/Threonine protein kinase
Kinases/Phosphatases	14	YP_009430224.1	Dulcis	830344..833479	YP_008437210.1	Salinus	753847..756268	Serine/Threonine protein kinase
Kinases/Phosphatases	15	YP_009165263.1	Mollivirus	334572..335892	YP_009430193.1	Dulcis	487207..489818	serine/threonine phosphatase 2c
Kinases/Phosphatases	15	YP_009165263.1	Mollivirus	334572..335892	YP_009429980.1	Salinus	408598..411230	serine/threonine phosphatase 2c
Kinases/Phosphatases	15	YP_009430193.1	Dulcis	487207..489818	YP_009429980.1	Salinus	408598..411230	serine/threonine phosphatase 2c
Kinases/Phosphatases	16	NP_048973.2	PBCV1	295254..296219	AUL78063.1	Tupanvirus	707847..709172	F10-like kinase
Kinases/Phosphatases	16	YP_003407151.1	Marseillevirus	347718..348461	YP_009094881.1	Melbournevirus	351116..351859	F10-like kinase
Kinases/Phosphatases	16	YP_003969942.1	CroV	339469..340665	NP_048973.2	PBCV1	295254..296219	F10-like kinase
Kinases/Phosphatases	16	YP_003969942.1	CroV	339469..340665	AUL78063.1	Tupanvirus	707847..709172	F10-like kinase
Kinases/Phosphatases	16	YP_003986904.1	APMV	527464..528874	YP_003969942.1	CroV	339469..340665	F10-like kinase
Kinases/Phosphatases	16	YP_003986904.1	APMV	527464..528874	NP_048973.2	PBCV1	295254..296219	F10-like kinase
Kinases/Phosphatases	16	YP_003986904.1	APMV	527464..528874	AUL78063.1	Tupanvirus	707847..709172	F10-like kinase
Kinases/Phosphatases	14	YP_003406996.1	Marseillevirus	208853..211597	YP_009094732.1	Melbournevirus	213959..216703	divergent Serine/Threonine protein kinase
Kinases/Phosphatases	17	YP_003970108.1	CroV	524205..525014	AUL77859.1	Tupanvirus	450463..451548	protein phosphatase 2C
Kinases/Phosphatases	17	YP_003986808.1	APMV	390391..391350	YP_003970108.1	CroV	524205..525014	protein phosphatase 2C
Kinases/Phosphatases	17	YP_003986808.1	APMV	390391..391350	AUL77859.1	Tupanvirus	450463..451548	protein phosphatase 2C
Kinases/Phosphatases	19	YP_008319376.2	Dulcis	1057964..1058906	YP_008437581.1	Salinus	1097638..1098377	Dual specificity phosphatases (DSP); Ser/Thr and Tyr protein phosphatases
Kinases/Phosphatases	19	YP_008319393.2	Dulcis	1080422..1081259	YP_009430045.1	Salinus	1118476..1119505	Dual specificity phosphatases (DSP); Ser/Thr and Tyr protein phosphatases
Kinases/Phosphatases	20	YP_008318809.1	Dulcis	329240..330461	YP_008436705.1	Salinus	269537..270866	acid phosphatase class B
Major Capsid Protein	8	NP_048787.1	PBCV1	210155..211468	AUL78147.1	Tupanvirus	798560..800524	NCLDV major capsid protein
Major Capsid Protein	8	YP_003407071.1	Marseillevirus	284716..286149	YP_009094806.1	Melbournevirus	285775..287199	NCLDV major capsid protein
Major Capsid Protein	8	YP_003407071.1	Marseillevirus	284716..286149	NP_048787.1	PBCV1	210155..211468	NCLDV major capsid protein
Major Capsid Protein	8	YP_003969975.1	CroV	383416..384936	YP_003407071.1	Marseillevirus	284716..286149	NCLDV major capsid protein
Major Capsid Protein	8	YP_003969975.1	CroV	383416..384936	YP_009094806.1	Melbournevirus	285775..287199	NCLDV major capsid protein
Major Capsid Protein	8	YP_003969975.1	CroV	383416..384936	NP_048787.1	PBCV1	210155..211468	NCLDV major capsid protein
Major Capsid Protein	8	YP_003969975.1	CroV	383416..384936	AUL78147.1	Tupanvirus	798560..800524	NCLDV major capsid protein
Major Capsid Protein	8	YP_003970031.1	CroV	444344..445729	YP_293839.2	EhV	86013..87503	NCLDV major capsid protein
Major Capsid Protein	8	YP_003986929.1	APMV	557477..560972	YP_003969975.1	CroV	383416..384936	NCLDV major capsid protein
Major Capsid Protein	8	YP_003986929.1	APMV	557477..560972	NP_048787.1	PBCV1	210155..211468	NCLDV major capsid protein
Major Capsid Protein	8	YP_003986929.1	APMV	557477..560972	AUL78147.1	Tupanvirus	798560..800524	NCLDV major capsid protein
Major Capsid Protein	8	YP_009052173.1	AaV	96238..97650	YP_003986929.1	APMV	557477..560972	NCLDV major capsid protein
Major Capsid Protein	8	YP_009052173.1	AaV	96238..97650	YP_003969975.1	CroV	383416..384936	NCLDV major capsid protein
Major Capsid Protein	8	YP_009052173.1	AaV	96238..97650	YP_293839.2	EhV	86013..87503	NCLDV major capsid protein
Major Capsid Protein	8	YP_009052173.1	AaV	96238..97650	NP_048787.1	PBCV1	210155..211468	NCLDV major capsid protein
Major Capsid Protein	8	YP_009052173.1	AaV	96238..97650	AUL78147.1	Tupanvirus	798560..800524	NCLDV major capsid protein
Major Capsid Protein	8	YP_009052321.1	AaV	233190..234893	YP_003407071.1	Marseillevirus	284716..286149	NCLDV major capsid protein
Major Capsid Protein	8	YP_009052321.1	AaV	233190..234893	YP_009094806.1	Melbournevirus	285775..287199	NCLDV major capsid protein
Major Capsid Protein	8	YP_009094806.1	Melbournevirus	285775..287199	NP_048787.1	PBCV1	210155..211468	NCLDV major capsid protein
Major Capsid Protein	8	YP_293839.2	EhV	86013..87503	YP_009165313.1	Mollivirus	413025..414925	NCLDV major capsid protein
Major Capsid Protein	8	YP_293839.2	EhV	86013..87503	NP_048978.1	PBCV1	298138..299700	NCLDV major capsid protein
Other	18	YP_009165367.1	Mollivirus	495273..497099	YP_009430205.1	Dulcis	662594..664595	Patatin phospholipase
Other	18	YP_009165367.1	Mollivirus	495273..497099	YP_008437017.1	Salinus	583205..585322	Patatin phospholipase
Other	18	YP_009430205.1	Dulcis	662594..664595	YP_008437017.1	Salinus	583205..585322	Patatin phospholipase
Other	21	YP_003407123.1	Marseillevirus	322927..324141	YP_009094856.1	Melbournevirus	324387..325601	uracil-DNA glycosylase
Other	27	YP_003407137.1	Marseillevirus	339483..340181	YP_009094869.1	Melbournevirus	342881..343531	histone H3-like protein
Other	27	YP_003407138.1	Marseillevirus	340304..341044	YP_009094870.1	Melbournevirus	343633..344442	Histone 2A-domain-containing protein
Other	28	YP_003969951.1	CroV	352573..352809	AUL78280.1	Tupanvirus	952315..952821	Zn-finger protein
Other	28	YP_003986994.1	APMV	648951..649553	YP_003969951.1	CroV	352573..352809	Zn-finger protein
Other	28	YP_003986994.1	APMV	648951..649553	AUL78280.1	Tupanvirus	952315..952821	Zn-finger protein
Other	29	YP_003969965.1	CroV	374489..376288	AUL78082.1	Tupanvirus	727298..729310	Poxvirus P4B major core protein
Other	29	YP_003986914.1	APMV	539683..541766	YP_003969965.1	CroV	374489..376288	Poxvirus P4B major core protein
Other	29	YP_003986914.1	APMV	539683..541766	AUL78082.1	Tupanvirus	727298..729310	Poxvirus P4B major core protein
Other	30	YP_003987040.1	APMV	707217..708288	YP_008319991.1	Dulcis	1858472..1859835	Esterase lipase superfamily
Other	30	YP_003987040.1	APMV	707217..708288	YP_008438887.1	Salinus	2414424..2415991	Esterase lipase superfamily
Other	30	YP_008319991.1	Dulcis	1858472..1859835	YP_008438887.1	Salinus	2414424..2415991	Esterase lipase superfamily
Other	31	YP_003970091.1	CroV	506495..507547	AUL77886.1	Tupanvirus	482730..483818	DNA polymerase family X	AP (apurinic) endonuclease family 2
Other	31	YP_003986821.1	APMV	403797..404904	YP_003970091.1	CroV	506495..507547	DNA polymerase family X	AP (apurinic) endonuclease family 2
Other	31	YP_003986821.1	APMV	403797..404904	AUL77886.1	Tupanvirus	482730..483818	DNA polymerase family X	AP (apurinic) endonuclease family 2
Other	32	YP_008318784.1	Dulcis	301345..302902	YP_008436674.1	Salinus	240205..241978	collagen triple helix repeat containing protein	collagen triple helix repeat motif-containing protein
Other	32	YP_008318784.1	Dulcis	301345..302902	YP_009001332.1	Pithovirus	557066..558178	collagen triple helix repeat containing protein	collagen triple helix repeat motif-containing protein
Other	33	YP_003987129.1	APMV	808112..808628	YP_008318899.1	Dulcis	441864..442911	mannose-6P isomerase
Other	33	YP_003987129.1	APMV	808112..808628	YP_008436799.1	Salinus	362851..364136	mannose-6P isomerase
Other	33	YP_008318899.1	Dulcis	441864..442911	YP_008436799.1	Salinus	362851..364136	mannose-6P isomerase
Other	34	YP_003406905.1	Marseillevirus	123745..124653	YP_009094647.1	Melbournevirus	129151..130059	glycosyltransferase
Other	34	YP_009165319.1	Mollivirus	425466..426553	YP_009000965.1	Pithovirus	81181..81931	glycosyltransferase
Other	35	YP_008318815.1	Dulcis	337046..338067	YP_008436716.2	Salinus	281085..282042	Ubiquitin
Other	36	YP_008319970.1	Dulcis	1821816..1822967	YP_008438864.1	Salinus	2391381..2392367	Nudix hydrolase
Other	37	YP_003987412.1	APMV	1141492..1142005	YP_008438593.1	Salinus	2120384..2121656	lipocalin family protein
Other	37	YP_009165253.1	Mollivirus	320146..321417	YP_008438593.1	Salinus	2120384..2121656	lipocalin family protein
Other	38	YP_003986888.1	APMV	503815..504866	AUL78032.1	Tupanvirus	671817..672866	FtsJ-like methyltransferase
Other	39	YP_003407128.1	Marseillevirus	330474..333101	YP_009094861.1	Melbournevirus	331964..334561	AAA family ATPase - unique in NCLDV; ATPase domain similar to repl_factorC_sub2
Proteases	22	YP_003969816.1	CroV	204314..205198	AUL77949.1	Tupanvirus	563658..564575	Ulp1 protease
Proteases	22	YP_003986858.1	APMV	461255..464103	YP_003969816.1	CroV	204314..205198	Ulp1 protease
Proteases	22	YP_003986858.1	APMV	461255..464103	AUL77949.1	Tupanvirus	563658..564575	Ulp1 protease
Proteases	23	YP_009430199.1	Dulcis	559064..561807	YP_008436915.1	Salinus	480493..483071	trypsin-like serine protease
Proteases	24	YP_003407012.1	Marseillevirus	224983..226533	YP_009094748.1	Melbournevirus	230083..231633	papain-like cysteine peptidase (Cathepsin B group)
Proteases	24	YP_003407021.1	Marseillevirus	232329..233645	YP_009094756.1	Melbournevirus	237430..238746	papain-like cysteine peptidase (Cathepsin B group)
Proteases	24	YP_003407021.1	Marseillevirus	232329..233645	YP_008319609.1	Dulcis	1356230..1360045	papain-like cysteine peptidase (Cathepsin B group)
Proteases	24	YP_009094756.1	Melbournevirus	237430..238746	YP_008319609.1	Dulcis	1356230..1360045	papain-like cysteine peptidase (Cathepsin B group)
Proteases	25	YP_003987251.1	APMV	944878..947556	AUL78691.1	Tupanvirus	1372260..1374764	metallopeptidase WLM
Proteases	26	YP_008319148.1	Dulcis	767010..768803	YP_009430007.1	Salinus	688637..690346	otubain-like protein
Redox	11	YP_003406846.1	Marseillevirus	71455..72798	YP_009094586.1	Melbournevirus	73091..74434	Flavin-containing amine oxidoreductase
Redox	11	YP_003406846.1	Marseillevirus	71455..72798	YP_009165388.1	Mollivirus	526320..528160	Flavin-containing amine oxidoreductase
Redox	11	YP_003406846.1	Marseillevirus	71455..72798	YP_008319382.2	Dulcis	1064795..1067580	Flavin-containing amine oxidoreductase
Redox	11	YP_003406846.1	Marseillevirus	71455..72798	YP_009430044.1	Salinus	1103255..1106092	Flavin-containing amine oxidoreductase
Redox	11	YP_003986682.1	APMV	227518..229079	YP_003406846.1	Marseillevirus	71455..72798	Flavin-containing amine oxidoreductase
Redox	11	YP_003986682.1	APMV	227518..229079	YP_009094586.1	Melbournevirus	73091..74434	Flavin-containing amine oxidoreductase
Redox	11	YP_003986682.1	APMV	227518..229079	YP_009165388.1	Mollivirus	526320..528160	Flavin-containing amine oxidoreductase
Redox	11	YP_003986682.1	APMV	227518..229079	YP_008319382.2	Dulcis	1064795..1067580	Flavin-containing amine oxidoreductase
Redox	11	YP_003986682.1	APMV	227518..229079	YP_009430044.1	Salinus	1103255..1106092	Flavin-containing amine oxidoreductase
Redox	11	YP_003987467.1	APMV	1157279..1159506	YP_009001244.1	Pithovirus	436204..437862	Flavin-containing amine oxidoreductase
Redox	11	YP_008319382.2	Dulcis	1064795..1067580	YP_009430044.1	Salinus	1103255..1106092	Flavin-containing amine oxidoreductase
Redox	11	YP_008319920.2	Dulcis	1749656..1751514	YP_008438680.1	Salinus	2196740..2199261	Flavin-containing amine oxidoreductase
Redox	11	YP_009001244.1	Pithovirus	436204..437862	AUL77599.1	Tupanvirus	128255..130339	Flavin-containing amine oxidoreductase
Redox	11	YP_009094586.1	Melbournevirus	73091..74434	YP_009165388.1	Mollivirus	526320..528160	Flavin-containing amine oxidoreductase
Redox	11	YP_009094586.1	Melbournevirus	73091..74434	YP_008319382.2	Dulcis	1064795..1067580	Flavin-containing amine oxidoreductase
Redox	11	YP_009094586.1	Melbournevirus	73091..74434	YP_009430044.1	Salinus	1103255..1106092	Flavin-containing amine oxidoreductase
Redox	11	YP_009165007.1	Mollivirus	36144..37925	YP_008319920.2	Dulcis	1749656..1751514	Flavin-containing amine oxidoreductase
Redox	11	YP_009165007.1	Mollivirus	36144..37925	YP_008438680.1	Salinus	2196740..2199261	Flavin-containing amine oxidoreductase
Redox	11	YP_009165388.1	Mollivirus	526320..528160	YP_008319382.2	Dulcis	1064795..1067580	Flavin-containing amine oxidoreductase
Redox	11	YP_009165388.1	Mollivirus	526320..528160	YP_009430044.1	Salinus	1103255..1106092	Flavin-containing amine oxidoreductase
Redox	12	YP_003969775.1	CroV	152743..153288	YP_009094779.1	Melbournevirus	257820..258218	disulfide (thiol) oxidoreductase, Erv1 / Alr family
Redox	12	YP_003969775.1	CroV	152743..153288	YP_008319152.2	Dulcis	771807..772940	disulfide (thiol) oxidoreductase, Erv1 / Alr family
Redox	12	YP_003969775.1	CroV	152743..153288	YP_008437137.1	Salinus	693256..694201	disulfide (thiol) oxidoreductase, Erv1 / Alr family
Redox	12	YP_003969775.1	CroV	152743..153288	NP_048821.1	PBCV1	223814..224170	disulfide (thiol) oxidoreductase, Erv1 / Alr family
Redox	12	YP_003987112.1	APMV	790119..790997	YP_003969775.1	CroV	152743..153288	disulfide (thiol) oxidoreductase, Erv1 / Alr family
Redox	12	YP_008319152.2	Dulcis	771807..772940	YP_008437137.1	Salinus	693256..694201	disulfide (thiol) oxidoreductase, Erv1 / Alr family
Redox	12	YP_009094779.1	Melbournevirus	257820..258218	YP_008319152.2	Dulcis	771807..772940	disulfide (thiol) oxidoreductase, Erv1 / Alr family
Redox	12	YP_009094779.1	Melbournevirus	257820..258218	YP_008437137.1	Salinus	693256..694201	disulfide (thiol) oxidoreductase, Erv1 / Alr family
Redox	12	YP_009165401.1	Mollivirus	549505..550134	YP_008437137.1	Salinus	693256..694201	disulfide (thiol) oxidoreductase, Erv1 / Alr family
Redox	13	YP_003406971.1	Marseillevirus	183691..184065	YP_009094708.1	Melbournevirus	189033..189407	Thioredoxin
Redox	13	YP_003407062.1	Marseillevirus	278419..279030	YP_009094795.1	Melbournevirus	279708..280133	Thioredoxin
Redox	13	YP_008319150.1	Dulcis	769377..771431	YP_008437133.1	Salinus	691198..693044	Thioredoxin
Redox	13	YP_008319188.1	Dulcis	818636..820097	YP_008437193.1	Salinus	740873..742621	Thioredoxin
Redox	13	YP_009165380.1	Mollivirus	516279..517150	YP_008319188.1	Dulcis	818636..820097	Thioredoxin
Redox	13	YP_009165380.1	Mollivirus	516279..517150	YP_008437193.1	Salinus	740873..742621	Thioredoxin
Redox	12	YP_008319154.1	Dulcis	773278..774718	YP_008437139.1	Salinus	694979..696140	ERV/alR sulphydryl oxidase-like protein
Redox	13	YP_003986691.1	APMV	236409..236777	AUL78724.1	Tupanvirus	1411768..1412073	Thioredoxin-like protein
Redox	11	YP_008319757.1	Dulcis	1546111..1548447	YP_008438455.1	Salinus	1987546..1989705	Fad-linked oxidase
Transcription/RNA Processing	3	YP_003970115.1	CroV	532944..533921	AUL78244.1	Tupanvirus	900400..901488	DNA directed RNA polymerase subunit L
Transcription/RNA Processing	3	YP_003986977.1	APMV	616108..617278	AUL78244.1	Tupanvirus	900400..901488	DNA directed RNA polymerase subunit L
Transcription/RNA Processing	3	YP_003986740.1	APMV	301920..309991	YP_009001144.1	Pithovirus	309068..312836	DNA-directed RNA polymerase subunit beta
Transcription/RNA Processing	3	YP_003986740.1	APMV	301920..309991	AUL78361.1	Tupanvirus	1043939..1046407	DNA-directed RNA polymerase subunit beta
Transcription/RNA Processing	3	YP_009001144.1	Pithovirus	309068..312836	AUL78361.1	Tupanvirus	1043939..1046407	DNA-directed RNA polymerase subunit beta
Transcription/RNA Processing	3	YP_009052296.1	AaV	205303..208587	YP_003986740.1	APMV	301920..309991	DNA-directed RNA polymerase subunit beta
Transcription/RNA Processing	3	YP_009052296.1	AaV	205303..208587	YP_009001144.1	Pithovirus	309068..312836	DNA-directed RNA polymerase subunit beta
Transcription/RNA Processing	3	YP_009052296.1	AaV	205303..208587	AUL78361.1	Tupanvirus	1043939..1046407	DNA-directed RNA polymerase subunit beta
Transcription/RNA Processing	3	YP_003970001.1	CroV	406587..411068	YP_009001268.1	Pithovirus	472994..477225	DNA-directed RNA polymerase subunit alpha
Transcription/RNA Processing	3	YP_003970001.1	CroV	406587..411068	AUL78302.1	Tupanvirus	972234..976712	DNA-directed RNA polymerase subunit alpha
Transcription/RNA Processing	3	YP_003987013.1	APMV	667832..673837	YP_003970001.1	CroV	406587..411068	DNA-directed RNA polymerase subunit alpha
Transcription/RNA Processing	3	YP_003987013.1	APMV	667832..673837	YP_009001268.1	Pithovirus	472994..477225	DNA-directed RNA polymerase subunit alpha
Transcription/RNA Processing	3	YP_003987013.1	APMV	667832..673837	AUL78302.1	Tupanvirus	972234..976712	DNA-directed RNA polymerase subunit alpha
Transcription/RNA Processing	3	YP_009001268.1	Pithovirus	472994..477225	AUL78302.1	Tupanvirus	972234..976712	DNA-directed RNA polymerase subunit alpha
Transcription/RNA Processing	3	YP_003970070.1	CroV	483634..484332	AUL78016.1	Tupanvirus	649404..650003	DNA-directed RNA polymerase II subunit RPB7
Transcription/RNA Processing	3	YP_003986881.1	APMV	491868..492549	YP_003970070.1	CroV	483634..484332	DNA-directed RNA polymerase II subunit RPB7
Transcription/RNA Processing	3	YP_003986881.1	APMV	491868..492549	AUL78016.1	Tupanvirus	649404..650003	DNA-directed RNA polymerase II subunit RPB7
Transcription/RNA Processing	3	YP_003970125.1	CroV	541653..542210	AUL78739.1	Tupanvirus	1431753..1432337	DNA-dependent RNA polymerase subunit Rpb9
Transcription/RNA Processing	3	YP_003986704.1	APMV	254147..254837	YP_003970125.1	CroV	541653..542210	DNA-dependent RNA polymerase subunit Rpb9
Transcription/RNA Processing	3	YP_003986704.1	APMV	254147..254837	AUL78739.1	Tupanvirus	1431753..1432337	DNA-dependent RNA polymerase subunit Rpb9
Transcription/RNA Processing	3	YP_003970072.1	CroV	485129..485701	AUL78368.1	Tupanvirus	1052721..1053338	divergent DNA-directed RNA polymerase subunit 5
Transcription/RNA Processing	3	YP_003986731.1	APMV	289034..289749	YP_003970072.1	CroV	485129..485701	divergent DNA-directed RNA polymerase subunit 5
Transcription/RNA Processing	3	YP_003986731.1	APMV	289034..289749	AUL78368.1	Tupanvirus	1052721..1053338	divergent DNA-directed RNA polymerase subunit 5
Transcription/RNA Processing	7	YP_003407040.1	Marseillevirus	248579..251986	YP_009094776.1	Melbournevirus	252744..256151	Poxvirus early transcription factor (VETF), large subunit
Transcription/RNA Processing	7	YP_003407040.1	Marseillevirus	248579..251986	YP_009001347.1	Pithovirus	578160..581974	Poxvirus early transcription factor (VETF), large subunit
Transcription/RNA Processing	7	YP_003969924.1	CroV	316460..321946	AUL77899.1	Tupanvirus	499588..505809	Poxvirus early transcription factor (VETF), large subunit
Transcription/RNA Processing	7	YP_003986829.1	APMV	416378..422584	YP_003969924.1	CroV	316460..321946	Poxvirus early transcription factor (VETF), large subunit
Transcription/RNA Processing	7	YP_003986829.1	APMV	416378..422584	AUL77899.1	Tupanvirus	499588..505809	Poxvirus early transcription factor (VETF), large subunit
Transcription/RNA Processing	7	YP_009094776.1	Melbournevirus	252744..256151	YP_009001347.1	Pithovirus	578160..581974	Poxvirus early transcription factor (VETF), large subunit
Transcription/RNA Processing	3	YP_003970124.1	CroV	541195..541656	AUL78741.1	Tupanvirus	1434440..1435468	RNA polymerase subunit 6
Transcription/RNA Processing	5	YP_003406983.1	Marseillevirus	195584..196522	YP_009094720.1	Melbournevirus	200926..201864	Ribonuclease III
Transcription/RNA Processing	6	YP_003987041.1	APMV	708338..710698	AUL77795.1	Tupanvirus	353442..355805	XRN 5'-3' exonuclease
Transcription/RNA Processing	4	YP_003969844.1	CroV	229971..233018	AUL78031.1	Tupanvirus	668186..671743	mRNA capping enzyme large subunit, methyltransferase domain	mRNA capping enzyme N-terminal, ATPase and guanylyltransferase
Transcription/RNA Processing	4	YP_003986887.1	APMV	500222..503734	YP_003969844.1	CroV	229971..233018	mRNA capping enzyme large subunit, methyltransferase domain	mRNA capping enzyme N-terminal, ATPase and guanylyltransferase
Transcription/RNA Processing	4	YP_003986887.1	APMV	500222..503734	AUL78031.1	Tupanvirus	668186..671743	mRNA capping enzyme large subunit, methyltransferase domain	mRNA capping enzyme N-terminal, ATPase and guanylyltransferase
Transcription/RNA Processing	4	YP_009052285.1	AaV	194094..196826	YP_003986887.1	APMV	500222..503734	mRNA capping enzyme large subunit, methyltransferase domain	mRNA capping enzyme N-terminal, ATPase and guanylyltransferase
Transcription/RNA Processing	4	YP_009052285.1	AaV	194094..196826	YP_003969844.1	CroV	229971..233018	mRNA capping enzyme large subunit, methyltransferase domain	mRNA capping enzyme N-terminal, ATPase and guanylyltransferase
Transcription/RNA Processing	4	YP_009052285.1	AaV	194094..196826	AUL78031.1	Tupanvirus	668186..671743	mRNA capping enzyme large subunit, methyltransferase domain	mRNA capping enzyme N-terminal, ATPase and guanylyltransferase
Transcription/RNA Processing	4	YP_009094783.1	Melbournevirus	260961..263345	YP_009001355.1	Pithovirus	589016..592027	mRNA capping enzyme large subunit, methyltransferase domain	mRNA capping enzyme N-terminal, ATPase and guanylyltransferase
Translation	9	YP_008318758.1	Dulcis	269771..270600	YP_008436627.1	Salinus	200441..201167	translation initiation inhibitor yjgF family
Translation	9	YP_008319554.1	Dulcis	1289191..1290887	YP_008438019.1	Salinus	1526985..1528414	translation initiation inhibitor yjgF family
Translation	9	YP_009165045.1	Mollivirus	80597..81276	YP_008319611.1	Dulcis	1360435..1361686	translation initiation inhibitor yjgF family
Translation	9	YP_009165045.1	Mollivirus	80597..81276	YP_008436627.1	Salinus	200441..201167	translation initiation inhibitor yjgF family
Translation	10	YP_009165329.1	Mollivirus	440004..440925	YP_008319043.2	Dulcis	629913..630867	translation initiation factor eIF-4e-like protein	eukaryotic translation initiation factor 4E
Translation	10	YP_009165329.1	Mollivirus	440004..440925	YP_008436977.1	Salinus	548895..550515	translation initiation factor eIF-4e-like protein	eukaryotic translation initiation factor 4E
Translation	10	YP_008319043.2	Dulcis	629913..630867	YP_008436977.1	Salinus	548895..550515	eukaryotic translation initiation factor 4E
Unknown	1	YP_003406781.1	Marseillevirus	18873..20027	YP_009094526.1	Melbournevirus	18537..19691	uncharacterized protein
Unknown	1	YP_003406825.1	Marseillevirus	60096..60638	YP_009094566.1	Melbournevirus	62162..62704	uncharacterized protein
Unknown	1	YP_003406851.1	Marseillevirus	75182..76384	YP_009094590.1	Melbournevirus	76818..78020	uncharacterized protein
Unknown	1	YP_003406851.1	Marseillevirus	75182..76384	YP_009165460.1	Mollivirus	623504..624755	uncharacterized protein
Unknown	1	YP_003406851.1	Marseillevirus	75182..76384	YP_008319211.1	Dulcis	848733..850365	uncharacterized protein
Unknown	1	YP_003406851.1	Marseillevirus	75182..76384	AUL78400.1	Tupanvirus	1092109..1093407	uncharacterized protein
Unknown	1	YP_003406859.1	Marseillevirus	80933..81607	YP_009094597.1	Melbournevirus	82569..83243	uncharacterized protein
Unknown	1	YP_003406860.1	Marseillevirus	81650..82141	YP_009094598.1	Melbournevirus	83285..83776	uncharacterized protein
Unknown	1	YP_003406948.1	Marseillevirus	164123..164668	YP_009094686.1	Melbournevirus	169463..170008	uncharacterized protein
Unknown	1	YP_003406966.1	Marseillevirus	177313..179679	YP_009094703.1	Melbournevirus	182651..185017	uncharacterized protein
Unknown	1	YP_003406979.1	Marseillevirus	188214..189107	YP_009094715.1	Melbournevirus	193556..194404	uncharacterized protein
Unknown	1	YP_003406999.1	Marseillevirus	212186..213580	YP_009094733.1	Melbournevirus	217292..218686	uncharacterized protein
Unknown	1	YP_003407039.1	Marseillevirus	248024..248383	YP_009094775.1	Melbournevirus	252189..252698	uncharacterized protein
Unknown	1	YP_003407107.1	Marseillevirus	312492..313304	YP_009094842.1	Melbournevirus	311506..312318	uncharacterized protein
Unknown	1	YP_003407126.1	Marseillevirus	326086..328617	YP_009094859.1	Melbournevirus	327546..330077	uncharacterized protein
Unknown	1	YP_003407159.1	Marseillevirus	353656..354165	YP_009094888.1	Melbournevirus	357054..357563	uncharacterized protein
Unknown	1	YP_003969817.1	CroV	205268..207877	AUL78211.1	Tupanvirus	870261..874661	uncharacterized protein
Unknown	1	YP_003969818.1	CroV	207946..208530	AUL78214.1	Tupanvirus	876231..876902	uncharacterized protein
Unknown	1	YP_003969826.1	CroV	214507..215076	NP_048764.1	PBCV1	198725..199357	uncharacterized protein
Unknown	1	YP_003969847.1	CroV	234988..235530	AUL78292.1	Tupanvirus	963340..963915	uncharacterized protein
Unknown	1	YP_003969860.1	CroV	251267..251911	AUL78288.1	Tupanvirus	959728..960456	uncharacterized protein
Unknown	1	YP_003969918.1	CroV	312157..313518	AUL77929.1	Tupanvirus	533860..535554	uncharacterized protein
Unknown	1	YP_003969944.1	CroV	341642..346282	AUL78246.1	Tupanvirus	903064..908175	uncharacterized protein
Unknown	1	YP_003969946.1	CroV	347491..348474	AUL78059.1	Tupanvirus	703449..704705	uncharacterized protein
Unknown	1	YP_003969963.1	CroV	370595..373840	AUL78068.1	Tupanvirus	713899..715812	uncharacterized protein
Unknown	1	YP_003969969.1	CroV	378546..379892	NP_048844.1	PBCV1	235101..236054	uncharacterized protein
Unknown	1	YP_003969969.1	CroV	378546..379892	AUL78093.1	Tupanvirus	738240..739472	uncharacterized protein
Unknown	1	YP_003970058.1	CroV	470894..471292	NP_048980.1	PBCV1	299990..300355	uncharacterized protein
Unknown	1	YP_003986750.1	APMV	318658..319705	AUL78347.1	Tupanvirus	1027018..1028997	uncharacterized protein
Unknown	1	YP_003986810.1	APMV	392423..393407	AUL77863.1	Tupanvirus	453915..454751	uncharacterized protein
Unknown	1	YP_003986833.1	APMV	424766..425649	AUL77907.1	Tupanvirus	512164..512961	uncharacterized protein
Unknown	1	YP_003986843.1	APMV	436805..438661	YP_003969918.1	CroV	312157..313518	uncharacterized protein
Unknown	1	YP_003986843.1	APMV	436805..438661	AUL77929.1	Tupanvirus	533860..535554	uncharacterized protein
Unknown	1	YP_003986848.1	APMV	443506..446527	AUL77933.1	Tupanvirus	540977..543907	uncharacterized protein
Unknown	1	YP_003986850.1	APMV	447358..448829	AUL77936.1	Tupanvirus	545111..546643	uncharacterized protein
Unknown	1	YP_003986855.1	APMV	457822..458722	AUL77944.1	Tupanvirus	556727..557677	uncharacterized protein
Unknown	1	YP_003986894.1	APMV	509282..512571	AUL78045.1	Tupanvirus	685082..688129	uncharacterized protein
Unknown	1	YP_003986902.1	APMV	525015..526152	YP_003969946.1	CroV	347491..348474	uncharacterized protein
Unknown	1	YP_003986902.1	APMV	525015..526152	AUL78059.1	Tupanvirus	703449..704705	uncharacterized protein
Unknown	1	YP_003986903.1	APMV	526125..527254	AUL78061.1	Tupanvirus	705236..706780	uncharacterized protein
Unknown	1	YP_003986907.1	APMV	532104..534433	YP_003969963.1	CroV	370595..373840	uncharacterized protein
Unknown	1	YP_003986907.1	APMV	532104..534433	AUL78068.1	Tupanvirus	713899..715812	uncharacterized protein
Unknown	1	YP_003986921.1	APMV	549008..550495	YP_003969969.1	CroV	378546..379892	uncharacterized protein
Unknown	1	YP_003986921.1	APMV	549008..550495	AUL78093.1	Tupanvirus	738240..739472	uncharacterized protein
Unknown	1	YP_003986949.1	APMV	582140..585975	AUL78191.1	Tupanvirus	845008..848844	uncharacterized protein
Unknown	1	YP_003986961.1	APMV	599312..603151	YP_003969817.1	CroV	205268..207877	uncharacterized protein
Unknown	1	YP_003986961.1	APMV	599312..603151	AUL78211.1	Tupanvirus	870261..874661	uncharacterized protein
Unknown	1	YP_003986964.1	APMV	604614..605264	YP_003969818.1	CroV	207946..208530	uncharacterized protein
Unknown	1	YP_003986964.1	APMV	604614..605264	AUL78214.1	Tupanvirus	876231..876902	uncharacterized protein
Unknown	1	YP_003986966.1	APMV	606916..607692	AUL78219.1	Tupanvirus	880822..881544	uncharacterized protein
Unknown	1	YP_003986970.1	APMV	609808..610705	AUL78232.1	Tupanvirus	890023..890856	uncharacterized protein
Unknown	1	YP_003986979.1	APMV	618671..623809	YP_003969944.1	CroV	341642..346282	uncharacterized protein
Unknown	1	YP_003986979.1	APMV	618671..623809	AUL78246.1	Tupanvirus	903064..908175	uncharacterized protein
Unknown	1	YP_003986999.1	APMV	652099..653902	AUL78287.1	Tupanvirus	956994..959525	uncharacterized protein
Unknown	1	YP_003987000.1	APMV	654111..654842	YP_003969860.1	CroV	251267..251911	uncharacterized protein
Unknown	1	YP_003987000.1	APMV	654111..654842	AUL78288.1	Tupanvirus	959728..960456	uncharacterized protein
Unknown	1	YP_003987004.1	APMV	657630..658183	YP_003969847.1	CroV	234988..235530	uncharacterized protein
Unknown	1	YP_003987004.1	APMV	657630..658183	AUL78292.1	Tupanvirus	963340..963915	uncharacterized protein
Unknown	1	YP_003987046.1	APMV	715323..716940	YP_003969832.1	CroV	221823..222893	uncharacterized protein
Unknown	1	YP_003987068.1	APMV	739366..740982	AUL77723.1	Tupanvirus	267424..269277	uncharacterized protein
Unknown	1	YP_003987083.1	APMV	757894..758923	AUL77694.1	Tupanvirus	228287..229618	uncharacterized protein
Unknown	1	YP_003987099.1	APMV	777404..778668	AUL77680.1	Tupanvirus	206307..207503	uncharacterized protein
Unknown	1	YP_003987106.1	APMV	783107..783940	AUL77666.1	Tupanvirus	193481..193984	uncharacterized protein
Unknown	1	YP_003987108.1	APMV	786625..787431	NP_048433.1	PBCV1	44498..45226	uncharacterized protein
Unknown	1	YP_003987108.1	APMV	786625..787431	AUL77661.1	Tupanvirus	187045..187764	uncharacterized protein
Unknown	1	YP_003987215.1	APMV	908020..908787	AUL78575.1	Tupanvirus	1252298..1253044	uncharacterized protein
Unknown	1	YP_003987217.1	APMV	909677..910853	AUL78577.1	Tupanvirus	1255225..1256649	uncharacterized protein
Unknown	1	YP_003987234.1	APMV	927065..928461	AUL78637.1	Tupanvirus	1313454..1314716	uncharacterized protein
Unknown	1	YP_003987238.1	APMV	931460..932088	AUL78659.1	Tupanvirus	1334980..1335711	uncharacterized protein
Unknown	1	YP_003987253.1	APMV	948270..949001	AUL78702.1	Tupanvirus	1386921..1387460	uncharacterized protein
Unknown	1	YP_003987254.1	APMV	949078..949832	AUL78707.1	Tupanvirus	1391456..1392172	uncharacterized protein
Unknown	1	YP_003987362.1	APMV	1081164..1082468	YP_003406851.1	Marseillevirus	75182..76384	uncharacterized protein
Unknown	1	YP_003987362.1	APMV	1081164..1082468	YP_009165460.1	Mollivirus	623504..624755	uncharacterized protein
Unknown	1	YP_003987362.1	APMV	1081164..1082468	YP_008319211.1	Dulcis	848733..850365	uncharacterized protein
Unknown	1	YP_003987362.1	APMV	1081164..1082468	YP_008437231.1	Salinus	774764..776513	uncharacterized protein
Unknown	1	YP_003987362.1	APMV	1081164..1082468	AUL78400.1	Tupanvirus	1092109..1093407	uncharacterized protein
Unknown	1	YP_008318578.1	Dulcis	52409..53391	YP_008436496.1	Salinus	77068..78041	uncharacterized protein
Unknown	1	YP_008318635.1	Dulcis	126540..127634	YP_008436570.1	Salinus	146768..148227	uncharacterized protein
Unknown	1	YP_008318674.1	Dulcis	170238..171865	YP_008437738.1	Salinus	1240335..1242047	uncharacterized protein
Unknown	1	YP_008318709.1	Dulcis	213049..214286	YP_008436586.1	Salinus	159623..160634	uncharacterized protein
Unknown	1	YP_008318714.1	Dulcis	221513..222930	YP_008436591.1	Salinus	167032..168257	uncharacterized protein
Unknown	1	YP_008318729.1	Dulcis	235554..236116	YP_008436604.1	Salinus	178050..179243	uncharacterized protein
Unknown	1	YP_008318731.2	Dulcis	236895..238880	YP_008436606.2	Salinus	179083..181460	uncharacterized protein
Unknown	1	YP_008318733.1	Dulcis	239600..241664	YP_008436609.1	Salinus	182186..184245	uncharacterized protein
Unknown	1	YP_008318757.1	Dulcis	266614..269607	YP_009429960.1	Salinus	197152..200231	uncharacterized protein
Unknown	1	YP_008318763.1	Dulcis	274666..275708	YP_008436635.2	Salinus	206237..207356	uncharacterized protein
Unknown	1	YP_008318780.1	Dulcis	295998..297402	YP_008436663.1	Salinus	230011..231289	uncharacterized protein
Unknown	1	YP_008318785.1	Dulcis	302937..304304	YP_008436676.1	Salinus	241988..243772	uncharacterized protein
Unknown	1	YP_008318786.1	Dulcis	304723..306201	YP_008436677.2	Salinus	243400..245088	uncharacterized protein
Unknown	1	YP_008318787.1	Dulcis	306784..308167	YP_008436678.1	Salinus	245592..246597	uncharacterized protein
Unknown	1	YP_008318789.1	Dulcis	308411..312062	YP_008436681.2	Salinus	247120..250503	uncharacterized protein
Unknown	1	YP_008318797.1	Dulcis	318789..321206	YP_008436692.1	Salinus	258557..260569	uncharacterized protein
Unknown	1	YP_008318800.2	Dulcis	321376..323118	YP_009429964.1	Salinus	261688..263364	uncharacterized protein
Unknown	1	YP_008318823.1	Dulcis	352664..354529	YP_008436721.1	Salinus	284664..286785	uncharacterized protein
Unknown	1	YP_008318834.1	Dulcis	364258..365559	YP_008436734.1	Salinus	298338..299886	uncharacterized protein
Unknown	1	YP_008318836.1	Dulcis	367983..369050	YP_009429968.1	Salinus	301754..303566	uncharacterized protein
Unknown	1	YP_008318841.2	Dulcis	371732..372412	YP_008436742.1	Salinus	305967..306618	uncharacterized protein
Unknown	1	YP_008318842.1	Dulcis	372487..374644	YP_009429970.1	Salinus	306759..309133	uncharacterized protein
Unknown	1	YP_008318844.1	Dulcis	375701..377075	YP_008436747.1	Salinus	309797..311306	uncharacterized protein
Unknown	1	YP_008318847.1	Dulcis	379052..380805	YP_008436752.1	Salinus	312928..315125	uncharacterized protein
Unknown	1	YP_008318866.2	Dulcis	396508..397556	YP_008436762.1	Salinus	323731..325118	uncharacterized protein
Unknown	1	YP_008318883.1	Dulcis	422176..423041	YP_008436784.1	Salinus	346541..347577	uncharacterized protein
Unknown	1	YP_008318895.2	Dulcis	436032..437274	YP_008436794.2	Salinus	357446..358651	uncharacterized protein
Unknown	1	YP_008318898.1	Dulcis	438963..441912	YP_008436798.1	Salinus	360229..362878	uncharacterized protein
Unknown	1	YP_008318901.1	Dulcis	443378..445256	YP_008436802.1	Salinus	364433..366835	uncharacterized protein
Unknown	1	YP_008318904.1	Dulcis	448812..450053	YP_008436807.1	Salinus	369887..371009	uncharacterized protein
Unknown	1	YP_008318913.1	Dulcis	458949..461221	YP_008436815.1	Salinus	380277..382701	uncharacterized protein
Unknown	1	YP_008318915.1	Dulcis	463088..465330	YP_008436819.1	Salinus	384624..387006	uncharacterized protein
Unknown	1	YP_008318930.1	Dulcis	483227..483953	YP_008436836.1	Salinus	404113..405185	uncharacterized protein
Unknown	1	YP_008318932.2	Dulcis	484441..486060	YP_009429978.1	Salinus	405177..407401	uncharacterized protein
Unknown	1	YP_008318941.1	Dulcis	497763..498379	YP_008436851.1	Salinus	419403..420048	uncharacterized protein
Unknown	1	YP_008318943.1	Dulcis	499190..500696	YP_008436854.1	Salinus	420865..422090	uncharacterized protein
Unknown	1	YP_008318954.1	Dulcis	518219..519676	YP_008436869.1	Salinus	439383..440890	uncharacterized protein
Unknown	1	YP_008318959.1	Dulcis	527122..527900	YP_008436877.1	Salinus	447457..448397	uncharacterized protein
Unknown	1	YP_008318975.1	Dulcis	542081..543535	YP_008436896.1	Salinus	465074..466595	uncharacterized protein
Unknown	1	YP_008318989.1	Dulcis	555910..558862	YP_008436914.2	Salinus	477356..480147	uncharacterized protein
Unknown	1	YP_008318994.1	Dulcis	561970..564316	YP_008436917.1	Salinus	483290..485800	uncharacterized protein
Unknown	1	YP_008319013.1	Dulcis	595138..597178	YP_008436940.1	Salinus	512437..513898	uncharacterized protein
Unknown	1	YP_008319019.1	Dulcis	603792..604852	YP_008436948.1	Salinus	521090..522222	uncharacterized protein
Unknown	1	YP_008319039.1	Dulcis	623586..624052	YP_008436970.2	Salinus	542118..542757	uncharacterized protein
Unknown	1	YP_008319040.1	Dulcis	624305..626595	YP_008436971.1	Salinus	543067..544956	uncharacterized protein
Unknown	1	YP_008319044.1	Dulcis	631654..633281	YP_008436979.1	Salinus	550544..552384	uncharacterized protein
Unknown	1	YP_008319061.1	Dulcis	649380..651169	YP_008437001.1	Salinus	569595..571598	uncharacterized protein
Unknown	1	YP_008319064.1	Dulcis	656264..657259	YP_008437009.1	Salinus	576488..577523	uncharacterized protein
Unknown	1	YP_008319068.1	Dulcis	660789..662240	YP_008437014.1	Salinus	581787..583044	uncharacterized protein
Unknown	1	YP_008319094.2	Dulcis	690584..694509	YP_008437054.2	Salinus	614877..618959	uncharacterized protein
Unknown	1	YP_008319095.1	Dulcis	694510..696231	YP_008437055.1	Salinus	618960..620728	uncharacterized protein
Unknown	1	YP_008319107.1	Dulcis	705669..707018	YP_008437066.1	Salinus	628509..629866	uncharacterized protein
Unknown	1	YP_008319145.1	Dulcis	761300..762447	YP_008437124.1	Salinus	684930..685909	uncharacterized protein
Unknown	1	YP_008319146.2	Dulcis	762428..764810	YP_008437126.1	Salinus	686038..688430	uncharacterized protein
Unknown	1	YP_008319149.1	Dulcis	768757..769348	YP_008437131.1	Salinus	690287..690828	uncharacterized protein
Unknown	1	YP_008319157.1	Dulcis	774978..779938	YP_008437141.1	Salinus	696766..701604	uncharacterized protein
Unknown	1	YP_008319190.1	Dulcis	822936..823438	YP_008437198.1	Salinus	745518..745917	uncharacterized protein
Unknown	1	YP_008319205.1	Dulcis	841255..844253	YP_008437221.1	Salinus	766103..768708	uncharacterized protein
Unknown	1	YP_008319209.1	Dulcis	846456..848399	YP_008437224.1	Salinus	770985..772898	uncharacterized protein
Unknown	1	YP_008319211.1	Dulcis	848733..850365	YP_008437231.1	Salinus	774764..776513	uncharacterized protein
Unknown	1	YP_008319211.1	Dulcis	848733..850365	AUL78400.1	Tupanvirus	1092109..1093407	uncharacterized protein
Unknown	1	YP_008319228.1	Dulcis	867185..868250	YP_008437255.1	Salinus	792427..793625	uncharacterized protein
Unknown	1	YP_008319230.1	Dulcis	870686..872124	YP_008437259.1	Salinus	797104..798392	uncharacterized protein
Unknown	1	YP_008319231.2	Dulcis	872239..873316	YP_008437260.1	Salinus	798655..800099	uncharacterized protein
Unknown	1	YP_008319234.1	Dulcis	875184..877168	YP_008437266.1	Salinus	803245..805141	uncharacterized protein
Unknown	1	YP_008319269.2	Dulcis	916233..918774	YP_008437301.1	Salinus	838315..840196	uncharacterized protein
Unknown	1	YP_008319270.2	Dulcis	918792..920903	YP_008437303.1	Salinus	840265..841995	uncharacterized protein
Unknown	1	YP_008319287.1	Dulcis	942429..944955	YP_008437328.1	Salinus	863248..866849	uncharacterized protein
Unknown	1	YP_008319297.2	Dulcis	955926..958793	YP_008437349.1	Salinus	882697..885282	uncharacterized protein
Unknown	1	YP_008319306.1	Dulcis	968621..969366	YP_008438462.1	Salinus	1994410..1995465	uncharacterized protein
Unknown	1	YP_008319345.1	Dulcis	1009653..1013138	YP_008437394.1	Salinus	916372..919589	uncharacterized protein
Unknown	1	YP_008319384.1	Dulcis	1069231..1070056	YP_008437592.2	Salinus	1109187..1110347	uncharacterized protein
Unknown	1	YP_008319386.1	Dulcis	1072318..1073211	YP_008437593.1	Salinus	1110187..1111227	uncharacterized protein
Unknown	1	YP_008319404.1	Dulcis	1097064..1098728	YP_008437617.1	Salinus	1133593..1134982	uncharacterized protein
Unknown	1	YP_008319407.1	Dulcis	1100191..1101003	YP_008437622.1	Salinus	1139005..1139668	uncharacterized protein
Unknown	1	YP_008319411.1	Dulcis	1106206..1108538	YP_008437630.2	Salinus	1144976..1147221	uncharacterized protein
Unknown	1	YP_008319439.1	Dulcis	1143192..1144459	YP_008437670.1	Salinus	1178810..1179988	uncharacterized protein
Unknown	1	YP_008319505.1	Dulcis	1231108..1233350	YP_008436723.2	Salinus	286876..289032	uncharacterized protein
Unknown	1	YP_008319551.1	Dulcis	1285336..1286375	YP_009430086.1	Salinus	1522796..1523993	uncharacterized protein
Unknown	1	YP_008319592.1	Dulcis	1333172..1334385	YP_008438052.1	Salinus	1563437..1564703	uncharacterized protein
Unknown	1	YP_008319658.1	Dulcis	1411732..1412991	YP_008438116.1	Salinus	1618993..1620187	uncharacterized protein
Unknown	1	YP_008319684.1	Dulcis	1443239..1445086	YP_008438372.1	Salinus	1896433..1898082	uncharacterized protein
Unknown	1	YP_008319692.1	Dulcis	1456389..1457385	YP_008438154.2	Salinus	1652733..1653557	uncharacterized protein
Unknown	1	YP_008319713.1	Dulcis	1484808..1486014	YP_008438394.1	Salinus	1922992..1924164	uncharacterized protein
Unknown	1	YP_008319742.1	Dulcis	1526406..1528308	YP_008438435.1	Salinus	1967994..1969718	uncharacterized protein
Unknown	1	YP_008319746.2	Dulcis	1529942..1531396	YP_009430123.1	Salinus	1972402..1973860	uncharacterized protein
Unknown	1	YP_008319753.2	Dulcis	1540797..1543726	YP_008438449.2	Salinus	1981875..1984868	uncharacterized protein
Unknown	1	YP_008319789.1	Dulcis	1586501..1587879	YP_008438501.1	Salinus	2029165..2030341	uncharacterized protein
Unknown	1	YP_008319835.1	Dulcis	1642662..1644131	YP_008438560.1	Salinus	2088349..2090038	uncharacterized protein
Unknown	1	YP_008319839.1	Dulcis	1647539..1649113	YP_008438567.1	Salinus	2094059..2095717	uncharacterized protein
Unknown	1	YP_008319851.1	Dulcis	1660578..1661640	YP_008438581.1	Salinus	2106494..2107531	uncharacterized protein
Unknown	1	YP_008319879.1	Dulcis	1699484..1701856	YP_008438617.2	Salinus	2138339..2140708	uncharacterized protein
Unknown	1	YP_008319976.1	Dulcis	1831174..1832544	YP_009430151.1	Salinus	2401073..2402521	uncharacterized protein
Unknown	1	YP_008320004.1	Dulcis	1874320..1876263	YP_008438901.1	Salinus	2424855..2426792	uncharacterized protein
Unknown	1	YP_008436779.1	Salinus	339011..341023	AUL78702.1	Tupanvirus	1386921..1387460	uncharacterized protein
Unknown	1	YP_008437231.1	Salinus	774764..776513	AUL78400.1	Tupanvirus	1092109..1093407	uncharacterized protein
Unknown	1	YP_009052306.1	AaV	216327..217844	AUL78211.1	Tupanvirus	870261..874661	uncharacterized protein
Unknown	1	YP_009052402.1	AaV	315300..315833	NP_048764.1	PBCV1	198725..199357	uncharacterized protein
Unknown	1	YP_009094590.1	Melbournevirus	76818..78020	YP_009165460.1	Mollivirus	623504..624755	uncharacterized protein
Unknown	1	YP_009094590.1	Melbournevirus	76818..78020	YP_008319211.1	Dulcis	848733..850365	uncharacterized protein
Unknown	1	YP_009094590.1	Melbournevirus	76818..78020	AUL78400.1	Tupanvirus	1092109..1093407	uncharacterized protein
Unknown	1	YP_009165190.1	Mollivirus	247955..249530	YP_008319742.1	Dulcis	1526406..1528308	uncharacterized protein
Unknown	1	YP_009165190.1	Mollivirus	247955..249530	YP_008438435.1	Salinus	1967994..1969718	uncharacterized protein
Unknown	1	YP_009165230.1	Mollivirus	291207..294356	YP_008318913.1	Dulcis	458949..461221	uncharacterized protein
Unknown	1	YP_009165230.1	Mollivirus	291207..294356	YP_008436815.1	Salinus	380277..382701	uncharacterized protein
Unknown	1	YP_009165251.1	Mollivirus	318364..319220	YP_008319107.1	Dulcis	705669..707018	uncharacterized protein
Unknown	1	YP_009165251.1	Mollivirus	318364..319220	YP_008437066.1	Salinus	628509..629866	uncharacterized protein
Unknown	1	YP_009165273.1	Mollivirus	345646..346428	YP_008318954.1	Dulcis	518219..519676	uncharacterized protein
Unknown	1	YP_009165273.1	Mollivirus	345646..346428	YP_008436869.1	Salinus	439383..440890	uncharacterized protein
Unknown	1	YP_009165287.1	Mollivirus	379225..379973	YP_008318985.1	Dulcis	554400..555061	uncharacterized protein
Unknown	1	YP_009165321.1	Mollivirus	428576..429195	YP_008319064.1	Dulcis	656264..657259	uncharacterized protein
Unknown	1	YP_009165321.1	Mollivirus	428576..429195	YP_008437009.1	Salinus	576488..577523	uncharacterized protein
Unknown	1	YP_009165322.1	Mollivirus	429220..431493	YP_009430203.1	Dulcis	642478..645303	uncharacterized protein
Unknown	1	YP_009165322.1	Mollivirus	429220..431493	YP_008436991.1	Salinus	561333..564501	uncharacterized protein
Unknown	1	YP_009165414.1	Mollivirus	563476..564498	YP_008437082.1	Salinus	641492..642605	uncharacterized protein
Unknown	1	YP_009165460.1	Mollivirus	623504..624755	YP_008319211.1	Dulcis	848733..850365	uncharacterized protein
Unknown	1	YP_009165460.1	Mollivirus	623504..624755	YP_008437231.1	Salinus	774764..776513	uncharacterized protein
Unknown	1	YP_009165460.1	Mollivirus	623504..624755	AUL78400.1	Tupanvirus	1092109..1093407	uncharacterized protein
Unknown	1	YP_009165465.1	Mollivirus	629074..629783	YP_009001285.1	Pithovirus	495860..496451	uncharacterized protein
Unknown	1	YP_009430187.1	Dulcis	369380..369981	YP_009429969.1	Salinus	303607..304180	uncharacterized protein
Unknown	1	YP_009430190.1	Dulcis	408245..409800	YP_009429972.1	Salinus	332409..334077	uncharacterized protein
Unknown	1	YP_009430191.1	Dulcis	414897..416675	YP_008436779.1	Salinus	339011..341023	uncharacterized protein
Unknown	1	YP_009430191.1	Dulcis	414897..416675	AUL78702.1	Tupanvirus	1386921..1387460	uncharacterized protein
Unknown	1	YP_009430203.1	Dulcis	642478..645303	YP_008436991.1	Salinus	561333..564501	uncharacterized protein
Unknown	1	YP_009430208.1	Dulcis	670299..671508	YP_008438529.1	Salinus	2052445..2053576	uncharacterized protein
Unknown	1	YP_009430219.1	Dulcis	794516..796100	YP_008437167.1	Salinus	721892..723351	uncharacterized protein
Unknown	1	YP_009430231.1	Dulcis	953210..955925	YP_009430023.1	Salinus	879588..882479	uncharacterized protein
Unknown	1	YP_009430276.1	Dulcis	1635413..1637063	YP_008438552.1	Salinus	2080889..2082594	uncharacterized protein
Unknown	1	YP_009430282.1	Dulcis	1690137..1692100	YP_009430133.1	Salinus	2128187..2130131	uncharacterized protein
Unknown	1	YP_008319163.1	Dulcis	788590..791196	YP_008437160.1	Salinus	715683..718124	hexapeptide repeat protein
Unknown	1	YP_008319707.1	Dulcis	1478358..1479721	YP_008438388.1	Salinus	1918818..1920129	uncharacterized protein
Unknown	1	YP_009165162.1	Mollivirus	213509..214648	AUL77600.1	Tupanvirus	130404..131627	uncharacterized protein
Unknown	1	YP_008318777.2	Dulcis	290091..291755	YP_008436654.1	Salinus	223103..224531	F-box domain protein
Unknown	1	YP_008319739.1	Dulcis	1521607..1522746	YP_008438434.1	Salinus	1966295..1967873	BTB/POZ domain protein
Unknown	1	YP_003406970.1	Marseillevirus	182490..183659	YP_009094707.1	Melbournevirus	187835..189001	ankyrin repeat protein
Unknown	1	YP_003407060.1	Marseillevirus	276324..277757	YP_009094793.1	Melbournevirus	277427..278860	ankyrin repeat protein
Unknown	1	YP_003986993.1	APMV	643015..648863	AUL78278.1	Tupanvirus	945156..951218	ankyrin repeat protein
Unknown	1	YP_003407104.1	Marseillevirus	310936..311268	YP_009094839.1	Melbournevirus	309950..310282	2-cysteine adaptor domain (pfam08793). The virus-specific domain is found fused to OTU/A20-like peptidases and S/T protein kinases.

## Sheet: Supplemental Data 1.2
Supplemental Data 1.2. Metagenomic assembled contigs from TARA Oceans Dataset separated by water depth.
Deep Chlorophyll Maximum	Contig number	Percentage
Total	19388407	100
Non-viral + PL	2789	0.014385
Viral + Polysaccharide Lyases	116	0.000598
mesopelagic	Contig number	Percentage
total	10236193	100
Non-viral + PL	2951	0.028829
Viral + Polysaccharide Lyases	113	0.001104
Epipelagic	Contig number	Percentage
total	32780054	100
Non-viral + PL	4816	0.014692
Viral + Polysaccharide Lyases	270	0.000824

## Sheet: Supplemental Data 1.3
Supplemental Data 1.3. Metagenomic assembled contigs from TARA Oceans Dataset separated by size fraction.
< 0.22 µm	Contig number	Percentage
total	3942150	100
Non-viral + PL	297	0.007534
Viral + PL	76	0.001928
0.1-0.22 µm	Contig number	Percentage
total	3192414	100
Non-viral + PL	398	0.012467
Viral + PL	35	0.001096
0.22-0.45 µm	Contig number	Percentage
total	5984290	100
Non-viral + PL	753	0.012583
Viral + PL	103	0.001721
0.45-0.8 µm	Contig number	Percentage
total	5986303	100
Non-viral + PL	1707	0.028515
Viral + PL	155	0.002589
0.22-1.6 µm	Contig number	Percentage
total	11381410	100
Non-viral + PL	1521	0.013364
Viral + PL	97	0.000852
0.22-3 µm	Contig number	Percentage
total	31918087	100
Non-viral + PL	5880	0.018422
Viral + PL	33	0.000103

## Sheet: Supplemental Data 1.4
Supplemental Data 1.4. Metagenomic assembled contigs from TARA Oceans Dataset separated by Station.
Station	Total Contigs	Non-viral + Polysaccharide Lyase	Viral + Polysaccharide Lyase	total	Virus Specific
4	800000	115	7	122	5.74
7	395000	127	9	136	6.62
9	789000	125	15	140	10.71
18	992000	126	8	134	5.97
22	120000	14	1	15	6.67
23	486000	84	1	85	1.18
25	1040000	110	13	123	10.57
30	889000	131	17	148	11.49
31	436000	32	2	34	5.88
32	796000	138	8	146	5.48
33	223000	17	1	18	5.56
34	1140000	144	11	155	7.1
36	697000	57	9	66	13.64
37	740000	116	9	125	7.2
38	1100000	143	13	156	8.33
39	964000	149	9	158	5.7
41	988000	90	9	99	9.09
42	792000	35	1	36	2.78
45	252000	8	1	9	11.11
46	62500	5	0	5	0
48	458000	54	3	57	5.26
52	776000	61	1	62	1.61
56	450000	87	2	89	2.25
57	220000	19	0	19	0
58	269000	29	0	29	0
62	242000	21	0	21	0
64	1060000	93	1	94	1.06
65	1240000	174	3	177	1.69
66	554000	56	11	67	16.42
67	959000	132	10	142	7.04
68	2160000	405	27	432	6.25
70	1600000	401	49	450	10.89
72	1090000	144	8	152	5.26
76	2250000	473	26	499	5.21
78	2130000	288	17	305	5.57
82	568000	66	0	66	0
84	287000	19	0	19	0
85	814000	146	1	147	0.68
93	639000	208	3	211	1.42
94	508000	111	0	111	0
96	265000	44	0	44	0
98	760000	122	0	122	0
99	289000	41	0	41	0
100	1140000	235	3	238	1.26
102	1180000	224	0	224	0
109	1020000	188	2	190	1.05
110	953000	133	1	134	0.75
111	1160000	218	0	218	0
112	962000	252	4	256	1.56
122	3180000	720	67	787	8.51
123	2330000	493	25	518	4.83
124	2820000	515	41	556	7.37
125	2980000	616	40	656	6.1
128	540000	109	3	112	2.68
132	996000	171	0	171	0
133	1290000	225	1	226	0.44
137	984000	241	2	243	0.82
138	961000	186	0	186	0
140	344000	51	0	51	0
141	352000	45	0	45	0
142	937000	189	1	190	0.53
145	639000	113	0	113	0
146	577000	80	0	80	0
148	360000	42	0	42	0
148B	359000	83	1	84	1.19
149	591000	99	0	99	0
150	749000	91	1	92	1.09
151	766000	97	1	98	1.02
152	955000	180	0	180	0

## Sheet: Supplemental Data 1.5
Supplemental Data 1.5. One-way ANOVA corrected for multiple comparisons using Tukey’s multiple comparisons p-values for percentage of contigs that are viral by water depth.
	DCM	Epipelagic	Mesopelagic
DCM	-	0.9999	0.6103
Epipelagic		-	0.5372
Mesopelagic			-

## Sheet: Supplemental Data 1.6
Supplemental Data 1.6. One-way ANOVA corrected for multiple comparisons using Tukey’s multiple comparisons p-values for percentage of contigs that are viral by water fraction.
	0.1-0.22	0.22	0.22-0.45	0.45-0.8	0.22-1.6	0.22-3
0.1--0.22	-	0.0108	1	0.9691	0.5971	0.0078
0.22		-	0.0136	0.0001	<0.0001	<0.0001
0.22-0.45			-	0.9403	0.4877	0.0034
0.45-0.8				-	0.9706	0.0731
0.22-1.6					-	0.2104
0.22-3						-

## Sheet: Supplemental Data 1.7
Supplemental Data 1.7. One-way ANOVA corrected for multiple comparisons using Tukey’s multiple comparisons p-values for normalized metagenomics reads.
DCM - cellular vs. DCM - viral	>0.999
DCM - cellular vs. SRF - cellular	0.739
DCM - cellular vs. SRF - viral	<0.001
DCM - cellular vs. MES - cellular	>0.999
DCM - cellular vs. MES - viral	0.08
DCM - viral vs. SRF - cellular	0.999
DCM - viral vs. SRF - viral	0.006
DCM - viral vs. MES - cellular	>0.999
DCM - viral vs. MES - viral	0.161
SRF - cellular vs. SRF - viral	<0.001
SRF - cellular vs. MES - cellular	0.776
SRF - cellular vs. MES - viral	0.023
SRF - viral vs. MES - cellular	<0.001
SRF - viral vs. MES - viral	0.984
MES - cellular vs. MES - viral	0.088

## Sheet: Supplemental Data 1.8
Supplemental Data 2.1. One-way ANOVA corrected for multiple comparisons using Tukey’s multiple comparisons p-values for normalized metatranscriptomics reads.
SRF - cellular vs. SRF - viral	0.908
SRF - cellular vs. DCM - cellular	0.883
SRF - cellular vs. DCM - viral	0.796
SRF - cellular vs. MES - cellular	0.993
SRF - cellular vs. MES - viral	0.997
SRF - cellular vs. all - cellular	0.54
SRF - cellular vs. all - viral	0.504
SRF - viral vs. DCM - cellular	0.996
SRF - viral vs. DCM - viral	>0.999
SRF - viral vs. MES - cellular	0.696
SRF - viral vs. MES - viral	>0.999
SRF - viral vs. all - cellular	>0.999
SRF - viral vs. all - viral	>0.999
DCM - cellular vs. DCM - viral	0.984
DCM - cellular vs. MES - cellular	0.195
DCM - cellular vs. MES - viral	>0.999
DCM - cellular vs. all - cellular	0.999
DCM - cellular vs. all - viral	0.938
DCM - viral vs. MES - cellular	0.491
DCM - viral vs. MES - viral	>0.999
DCM - viral vs. all - cellular	0.996
DCM - viral vs. all - viral	>0.999
MES - cellular vs. MES - viral	0.972
MES - cellular vs. all - cellular	0.019
MES - cellular vs. all - viral	0.131
MES - viral vs. all - cellular	>0.999
MES - viral vs. all - viral	>0.999
all - cellular vs. all - viral	0.984
